# Supplementary material for: Bacterial Culture Underestimates Lung Pathogen Detection and Infection Status in Cystic Fibrosis
Source: PubMed Central journal article supplement (PMC9602735; doi:10.1128/spectrum.00419-22), 2022-08-16
Supplement: spectrum.00419-22-s0001.pdf [file spectrum.00419-22-s0001.pdf]

## Supplementary materials

### **Bacterial culture underestimates lung pathogen detection and infection status in cystic fibrosis**

Helen Gavillet<sup>1</sup>, Lauren Hatfield<sup>1</sup>, Damian Rivett<sup>2</sup>, Andrew Jones<sup>3,4</sup>, Anirban Maitra<sup>5</sup>, Alexander Horsley<sup>3,4,7</sup>, Christopher van der Gast<sup>1,6,7\*</sup>

<sup>1</sup> Department of Life Sciences, Manchester Metropolitan University, Manchester, UK

<sup>2</sup> Department of Natural Sciences, Manchester Metropolitan University, Manchester, UK

<sup>3</sup> Manchester Adult Cystic Fibrosis Centre, Manchester University NHS Foundation Trust, Manchester, UK

<sup>4</sup> Division of Infection, Immunity and Respiratory Medicine, University of Manchester, Manchester, UK

<sup>5</sup> Royal Manchester Children's Hospital, Manchester University NHS Foundation Trust, Manchester, Manchester, UK

<sup>6</sup> Department of Respiratory Medicine, Northern Care Alliance NHS Foundation Trust, Salford, UK

<sup>7</sup> Denotes senior authors of this work.

**\*Correspondence to:** Professor Chris van der Gast, Department of Life Sciences, Faculty of Science and Engineering, John Dalton Building, Chester Street, Manchester, M1 5GD, UK; C.vanderGast@mmu.ac.uk

## Literature Review

PubMed was searched for studies on cystic fibrosis (CF) published from database inception to January 30th, 2022, with the search terms “cystic fibrosis” AND “pathogen” AND “culture” AND “QPCR”, with no language restrictions (Table S1). Studies that did not use QPCR to target specific pathogens, that only used 16S rRNA gene targeted QPCR, only used next generation sequencing (NGS) approaches, or other detection methods such as dot blots were not considered in this literature review. Of the 21 papers that met the above criteria (Table S1), eight were cross-sectional only studies (1, 2, 5, 11, 12, 13, 19, 20). Of the remaining 13 papers that did incorporate some form of longitudinal sampling into their studies, ten studies pooled all samples for grouped analysis, irrespective of patients and time points that samples were taken from (3, 4, 6, 7, 9, 10, 16, 17, 18, 21).

The three remaining studies did explicitly track individual patients over time, but with caveats (8, 14, 15). One study (14), tracked individual patients but with a focus on the effectiveness of tracking *Pseudomonas aeruginosa* infection before it became apparent in routine clinical culture, and analysed data through pooled samples for a grouped average time to detection. A second study (15), focused on the impact of Ivacaftor on *P. aeruginosa* (PSA) along with the general microbiome via NGS. However, the analyses combined all patients as a group, discussing *P. aeruginosa* based results as an average of the group. The final paper (8), focused on similar issues to our study, i.e. whether QPCR would be more sensitive than conventional culture in the detection of PSA in individual patients through time. Comparison of targeted QPCR and culture was based chiefly on cough swab samples taken from only paediatric patients ( $n = 33$ ) over eight months from 2007; mean number of samples per patient ( $\pm$  SD) =  $4.2 \pm 1.4$ , minimum = 1 and maximum = 7. The study found an increased detection of *P. aeruginosa* when using QPCR. Although pathogen detection was plotted for individual patients, data was analysed only as a group. Finally, none of the studies explicitly investigated the impact that more sensitive detection methods would have on infection status or clinical outcomes.

**Table S1** Literature review comparing current study with results from PubMed search.

| No. patients | Paediatric            | Adult | No. samples (sample type)  | No. centres                                          | Target pathogen <sup>a</sup> | QPCR primer target(s) <sup>b</sup> | Comparison to matched culture <sup>c</sup>          | Study type   | Duration (months) | Were individuals tracked? | Analysis (Grouped or Individual) <sup>d</sup> | Key takeaway points                                                                   | Explicit clinical impact                                                                                             | Citation                                                                                                                              |                          |
|--------------|-----------------------|-------|----------------------------|------------------------------------------------------|------------------------------|------------------------------------|-----------------------------------------------------|--------------|-------------------|---------------------------|-----------------------------------------------|---------------------------------------------------------------------------------------|----------------------------------------------------------------------------------------------------------------------|---------------------------------------------------------------------------------------------------------------------------------------|--------------------------|
| 40           | 20                    | 20    | 328 (234 sputum, 94 swabs) | 2                                                    | PSA, SA                      | PSA: <i>oprL</i> , SA: <i>nuc</i>  | Yes                                                 | Longitudinal | 42 months         | Yes                       | Individual                                    | Comparison of culture data to QPCR, impact on clinical status for individual patients | Yes                                                                                                                  | This Study                                                                                                                            |                          |
| 1            | Not clearly specified | n/a   | n/a                        | 200 (175 from sputum, 21 from swabs and 4 from BAL)  | 1                            | PSA                                | <i>oprL/gyrB/ETA</i>                                | Yes          | Cross-sectional   | No                        | n/a                                           | Grouped                                                                               | Combinations of primer targets will improve PSA detection                                                            | No                                                                                                                                    | Qin X, 2003 (1)          |
| 2            | 8 patients            | n/a   | n/a                        | 8 (sputum)                                           | 1                            | PSA                                | <i>oprL</i>                                         | Yes          | Cross-sectional   | No                        | n/a                                           | Grouped                                                                               | Comparison of pre-treatments for samples to improve detection rates                                                  | No                                                                                                                                    | Deschaught 2009 (2)      |
| 3            | 397                   | n/a   | n/a                        | Unknown mix of sputum, nasopharyngeal or throat swab | 7                            | PSA                                | <i>oprL</i>                                         | Yes          | Longitudinal      | ca. 16 months             | No                                            | Grouped                                                                               | Culture and QPCR work just as well as each other, the predictive value of QPCR may be quite limited                  | No                                                                                                                                    | Deschaught 2010 (3)      |
| 4            | 33                    | 33    | 0                          | 103 (sputum)                                         | 1                            | PSA                                | <i>oprL</i>                                         | Yes          | Longitudinal      | ca. 30 months             | No                                            | Grouped                                                                               | QPCR can detect PSA before culture                                                                                   | No                                                                                                                                    | Billard-Pomares 2010 (4) |
| 5            | Not clearly specified | n/a   | n/a                        | n/a                                                  | Unknown                      | <i>Streptococcus spp.</i>          | <i>cpn60</i>                                        | No           | Cross-sectional   | No                        | n/a                                           | Grouped                                                                               | QPCR development                                                                                                     | No                                                                                                                                    | Olson 2010 (5)           |
| 6            | 16                    | n/a   | n/a                        | 159 (85 Sputum, 47 swabs and 27 saliva)              | 1                            | Various CF pathogens               | PSA: <i>PSD7F</i> , SA: <i>STPYF</i> , HI: unknown, | Yes          | Longitudinal      | ca. 12 months             | No                                            | Grouped                                                                               | Comparison of various pathogen primer targets                                                                        | No                                                                                                                                    | Zemanick 2010 (6)        |
| 7            | 183                   | 183   | 0                          | 2099 (851 sputum and 1248 throat swabs)              | 1                            | PSA                                | <i>gyrB/algD</i>                                    | Yes          | Longitudinal      | ca. 29 months             | No                                            | Grouped                                                                               | QPCR can detect PSA before culture                                                                                   | No                                                                                                                                    | Logan 2010 (7)           |
| 8            | 186                   | 186   | 0                          | 542 (42 sputum and 500 swabs)                        | 1                            | PSA                                | <i>Pa23</i>                                         | Yes          | Longitudinal      | ca. 19 months             | Yes                                           | Grouped                                                                               | QPCR is more sensitive than culture in PSA detection                                                                 | Stated clinical impact needs assessing but doesn't go beyond that                                                                     | McCulloch 2011 (8)       |
| 9            | 230                   | 74    | 156                        | 459 (293 sputum, 162 swab and 4 BAL)                 | 2                            | PSA                                | <i>gyrB</i>                                         | Yes          | Longitudinal      | ca. 30 months             | 1 patient tracked.                            | Grouped                                                                               | Analysis of PSA levels during exacerbation & stability, with optimised method. No difference found in disease states | States introduction of QPCR may have implications on better segregation strategies and could help patients be free of PSA for longer. | Fothergill 2013 (9)      |
| 10           | 34                    | n/a   | n/a                        | 46 (sputum)                                          | 3                            | PSA                                | <i>oprL/gyrB/ecfX</i>                               | Yes          | Longitudinal      | ca. 38 months             | No                                            | Grouped                                                                               | Prevention of false negatives using a 2-step confirmatory QPCR                                                       | No                                                                                                                                    | Le Gall 2013 (10)        |

|    |                       |     |     |                                       |         |                                               |                                                      |     |                 |                       |     |         |                                                                                                                      |                                                                                                                                                                 |                        |
|----|-----------------------|-----|-----|---------------------------------------|---------|-----------------------------------------------|------------------------------------------------------|-----|-----------------|-----------------------|-----|---------|----------------------------------------------------------------------------------------------------------------------|-----------------------------------------------------------------------------------------------------------------------------------------------------------------|------------------------|
| 11 | 9                     | 0   | 9   | 13 samples                            | 1       | PSA                                           | <i>oprL</i> and <i>ClpX</i>                          | No  | Cross-sectional | No                    | n/a | Grouped | Validation of 2 PSA reference genes in CF sputum                                                                     | No                                                                                                                                                              | Costaglioli 2014 (11)  |
| 12 | 65                    | 65  | 0   | 87 (45 sputum and 42 swabs)           | 1       | SA                                            | <i>femA</i>                                          | Yes | Cross-sectional | No                    | n/a | Grouped | Method comparison for sample processing.                                                                             | No                                                                                                                                                              | Johnson 2016 (12)      |
| 13 | Not clearly specified | n/a | n/a | 15 (11 sputum and 4 BAL)              | Unknown | NTM                                           | <i>atpE</i>                                          | Yes | Cross-sectional | No                    | n/a | Grouped | Comparison of sample processing methods for better NTM detection.                                                    | No                                                                                                                                                              | Caverly 2016 (13)      |
| 14 | 96                    | 96  | 0   | 707 (sputum)                          | 1       | PSA                                           | <i>oprL/gyrB/ecfX</i>                                | Yes | Longitudinal    | ca. 42 months         | Yes | Grouped | QPCR can detect PSA before culture                                                                                   | No                                                                                                                                                              | Héry-Arnaud 2017 (14)  |
| 15 | 12                    | 0   | 12  | Not clearly specified                 | 1       | PSA, <i>Streptococcus</i> , <i>Prevotella</i> | PSA: <i>gyrB</i> , SA: <i>nuc</i>                    | Yes | Longitudinal    | ca. 34 months         | Yes | Grouped | Ivacaftor briefly impacts PSA levels, but PSA somewhat recovers over time.                                           | No                                                                                                                                                              | Hisert 2017 (15)       |
| 16 | 64                    | n/a | n/a | 379 (141 throat swabs and 238 sputum) | 1       | PSA                                           | <i>oprL/ecfX/gyrB</i>                                | Yes | Longitudinal    | Not clearly specified | No  | Grouped | PSA abundance in swabs/sputum compared to culture, impact of mucoidity. Swabs may be beneficial for early detection. | No                                                                                                                                                              | Boutin 2018 (16)       |
| 17 | 47                    | 47  | 0   | 312 (sputum)                          | 1       | PSA                                           | <i>oprL</i>                                          | Yes | Longitudinal    | ca. 17 months         | No  | Grouped | Time taken for PSA positive culture to be determined vs. QPCR                                                        | No                                                                                                                                                              | Blanchard 2018 (17)    |
| 18 | Not clearly specified | n/a | n/a | 88 (sputum)                           | 1       | PSA                                           | <i>ecfX</i>                                          | Yes | Longitudinal    | ca. 20 months         | No  | Grouped | Comparison of sample storage, DNase treatments and QPCR targets.                                                     | No                                                                                                                                                              | Mangiatterra 2018 (18) |
| 19 | 9                     | 0   | 9   | 16 (sputum)                           | 1       | SM                                            | Custom primers for <i>Streptotrophomonas</i> strains | Yes | Cross-sectional | No                    | n/a | Grouped | QPCR development                                                                                                     | Identification of SM in clinic will allow for earlier detection and by extension may reduce prevalence of other emblematic pathogens through correct treatment. | Fraser 2019 (19)       |
| 20 | 78                    | 78  | 0   | 78 (BAL)                              | 7       | PSA, HI, SA, SM                               | Not clearly specified                                | Yes | Cross-sectional | No                    | n/a | Grouped | Correlation of bacterial density and presence of pathogens to inflammation, mucus plugging etc.                      | No                                                                                                                                                              | Taylor 2020 (20)       |
| 21 | 14                    | n/a | n/a | 28 (sputum)                           | 1       | PSA                                           | <i>oprL</i>                                          | No  | Longitudinal    | ca. 12 months         | Yes | Grouped | Does the prevalence of certain pathogens decrease with Ivacaftor treatment.                                          | No                                                                                                                                                              | Einarsson 2021 (21)    |

<sup>a</sup> PSA: *Pseudomonas aeruginosa*, SA: *Staphylococcus aureus*, NTM: Non-tuberculosis mycobacteria, SM: *Streptococcus maltophilia*, HI : *Haemophilus influenzae*

<sup>b</sup> Papers using 16S rRNA, NGS or other methods such as dot blots were not considered in this literature review

<sup>c</sup> Must have matched culture records for each sample

<sup>e</sup> Explicitly followed individually through time, or grouped (all samples irrespective of longitudinal/cross-sectional origin, or combined for analysis)



**Table S3** Clinical characteristics of individual patients.

| Patient | Age <sup>a</sup> | Sex    | CFTR Genotype |              | CF diabetes | Pancreatic insufficient | Lung function <sup>b</sup> |      | CFTR modulator therapy | Antibiotics received over course of study |              |             |               |              |          |                |             |                |           |              |          |            |            |   |
|---------|------------------|--------|---------------|--------------|-------------|-------------------------|----------------------------|------|------------------------|-------------------------------------------|--------------|-------------|---------------|--------------|----------|----------------|-------------|----------------|-----------|--------------|----------|------------|------------|---|
|         |                  |        | Genotype1     | Genotype2    |             |                         | Mean %FEV <sub>1</sub>     | SD   |                        | Amoxicillin                               | Azithromycin | Ceftazidime | Ciprofloxacin | Co-amoxiclav | Colistin | Co-trimoxazole | Doxycycline | Flucloxacillin | Meropenem | Penicillin V | Promixin | Rifampicin | Tobramycin |   |
| 101     | 22               | Male   | R334W         | R75X         | No          | No                      | 64.2                       | 2.1  | No                     |                                           | 1            |             |               |              | 1        |                | 1           |                | 1         |              |          |            |            | 1 |
| 103     | 22               | Male   | F508del       | 3849+10kbC>T | No          | No                      | 79.7                       | 7.9  | No                     |                                           | 1            |             |               |              |          | 1              |             |                |           |              |          |            |            |   |
| 104     | 28               | Male   | 3849+10kbC>T  | 3849+10kbC>T | No          | No                      | 77.9                       | 7.5  | No                     |                                           | 1            |             | 1             |              |          |                | 1           |                | 1         |              |          |            |            |   |
| 106     | 19               | Male   | F508del       | F508del      | No          | Yes                     | 57.2                       | 8.0  | No                     |                                           | 1            |             | 1             |              |          |                |             | 1              |           |              |          |            |            | 1 |
| 108     | 35               | Male   | F508del       | F508del      | No          | Yes                     | 60.7                       | 1.5  | No                     |                                           | 1            |             |               |              |          |                |             |                |           |              |          |            |            |   |
| 110     | 28               | Female | F508del       | F508del      | No          | Yes                     | 120.1                      | 2.7  | No                     |                                           | 1            |             | 1             |              | 1        |                |             |                |           |              |          |            |            | 1 |
| 112     | 24               | Male   | F508del       | F508del      | No          | No                      | 93.2                       | 4.5  | No                     |                                           |              |             |               |              | 1        |                |             |                |           |              |          |            |            |   |
| 113     | 21               | Female | F508del       | Delexon2-3   | No          | Yes                     | 58.1                       | 1.4  | No                     |                                           | 1            |             | 1             |              |          |                |             |                |           |              |          | 1          |            | 1 |
| 114     | 21               | Male   | F508del       | F508del      | No          | Yes                     | 87.2                       | 1.9  | No                     |                                           | 1            |             |               |              | 1        |                |             |                |           |              |          |            |            | 1 |
| 115     | 21               | Female | F508del       | F508del      | No          | Yes                     | 47.9                       | 2.2  | No                     |                                           | 1            |             |               |              |          |                | 1           |                |           |              |          |            |            |   |
| 116     | 24               | Male   | R117H         | S549N        | No          | No                      | 99.6                       | 2.1  | No                     |                                           |              | 1           |               |              |          |                |             |                |           |              |          |            |            |   |
| 118     | 25               | Female | F508del       | G85E         | No          | Yes                     | 73.8                       | 4.2  | No                     |                                           | 1            |             |               |              | 1        |                |             |                |           |              |          |            |            |   |
| 119     | 20               | Female | R553X         | 2622+1G->A   | Yes         | Yes                     | 47.9                       | 2.9  | No                     |                                           | 1            |             | 1             |              |          |                | 1           |                |           |              |          | 1          |            |   |
| 120     | 19               | Male   | F508del       | F508del      | No          | Yes                     | 78.6                       | 3.3  | No                     |                                           | 1            |             |               |              |          |                |             |                |           |              |          |            |            |   |
| 121     | 29               | Male   | F508del       | R117H        | No          | No                      | 92.9                       | 3.7  | No                     |                                           | 1            |             | 1             |              |          |                | 1           |                |           |              |          |            |            |   |
| 132     | 23               | Female | F508del       | G551D        | No          | Yes                     | 105.7                      | 2.3  | Ivacaftor              |                                           | 1            |             | 1             |              |          |                |             |                |           |              |          |            |            |   |
| 133     | 29               | Male   | F508del       | 2789+5G>A    | No          | Yes                     | 80.7                       | 6.6  | No                     |                                           | 1            |             |               |              |          |                |             |                |           |              |          |            |            |   |
| 135     | 29               | Female | N1303K        | R117H        | No          | No                      | 83.0                       | 5.1  | No                     |                                           |              |             |               |              | 1        |                |             |                |           |              |          |            |            |   |
| 140     | 17               | Male   | F508del       | 2622+1G>A    | No          | No                      | 47.3                       | 6.9  | No                     |                                           | 1            |             |               |              |          |                | 1           |                |           | 1            |          |            |            | 1 |
| 147     | 21               | Female | F508del       | M111R        | No          | Yes                     | 71.4                       | 2.7  | No                     |                                           | 1            |             | 1             |              |          |                | 1           |                |           |              |          |            |            |   |
| 201     | 12               | Female | F508del       | G551D        | No          | Yes                     | 84.4                       | 2.7  | Ivacaftor              |                                           |              |             |               |              |          |                |             |                |           |              |          |            |            |   |
| 203     | 6                | Female | F508del       | F508del      | No          | Yes                     | 100.2                      | 10.7 | No                     |                                           | 1            |             |               |              | 1        |                |             |                |           |              |          |            |            |   |
| 206     | 9                | Female | G551D         | 1461ins4     | No          | Yes                     | 91.1                       | 6.6  | Ivacaftor              |                                           |              |             |               |              |          |                |             |                |           |              |          |            |            |   |
| 207     | 6                | Female | 1525-1G>A     | 1525-1G>A    | No          | Yes                     | 95.7                       | 6.0  | No                     |                                           | 1            |             |               |              |          |                |             |                |           |              |          |            |            |   |
| 212     | 9                | Female | F508del       | F508del      | No          | Yes                     | 83.9                       | 6.3  | No                     |                                           |              |             |               |              |          |                |             |                |           |              |          |            |            |   |
| 213     | 6                | Male   | F508del       | F508del      | No          | Yes                     | 82.3                       | 15.7 | No                     |                                           | 1            |             |               |              | 1        |                |             |                |           |              |          |            |            |   |
| 216     | 9                | Female | S549N         | S549N        | No          | Yes                     | 117.8                      | 5.2  | No                     |                                           |              |             |               |              |          |                |             |                |           |              |          |            |            |   |
| 217     | 8                | Male   | F508del       | G542X        | No          | Yes                     | 100.4                      | 2.7  | No                     |                                           | 1            |             |               |              |          |                |             |                |           |              |          |            |            |   |
| 218     | 11               | Male   | F508del       | F508del      | No          | Yes                     | 89.6                       | 6.6  | No                     |                                           | 1            |             |               |              |          |                |             |                |           |              |          |            |            |   |
| 219     | 8                | Male   | F508del       | R560T        | No          | Yes                     | 98.7                       | 1.4  | No                     |                                           | 1            |             |               |              |          |                |             |                |           |              |          |            |            |   |
| 223     | 8                | Male   | F508del       | S1235R       | No          | No                      | 110.0                      | 1.7  | No                     |                                           | 1            |             |               |              |          |                |             |                |           |              |          |            |            |   |
| 225     | 12               | Female | F508del       | F508del      | No          | Yes                     | 91.6                       | 4.6  | No                     |                                           | 1            |             |               |              |          |                |             |                |           |              |          |            |            |   |
| 228     | 6                | Male   | F508del       | R553X        | No          | Yes                     | 99.8                       | 6.2  | No                     |                                           |              |             |               |              |          |                |             |                |           |              |          |            |            |   |
| 233     | 15               | Male   | F508del       | F508del      | No          | Yes                     | 71.2                       | 9.9  | No                     |                                           | 1            |             |               |              |          |                |             |                |           |              |          |            |            |   |
| 235     | 15               | Male   | F508del       | F508del      | No          | Yes                     | 86.8                       | 3.6  | No                     |                                           | 1            |             |               |              |          |                |             |                |           |              |          |            |            |   |
| 240     | 11               | Female | F508del       | F508del      | No          | Yes                     | 60.6                       | 6.3  | No                     |                                           | 1            |             |               |              |          |                |             |                |           |              |          |            |            |   |
| 241     | 8                | Male   | F508del       | R117H        | No          | Yes                     | 90.9                       | 1.1  | No                     |                                           |              |             |               |              |          |                |             |                |           |              |          |            |            |   |
| 242     | 6                | Female | F508del       | G551D        | No          | Yes                     | 74.7                       | 8.6  | Ivacaftor              |                                           | 1            |             |               |              |          |                |             |                |           |              |          |            |            |   |
| 245     | 6                | Male   | F508del       | F508del      | No          | Yes                     | 92.0                       | 14.2 | No                     |                                           | 1            |             | 1             |              |          |                |             |                |           |              |          |            |            |   |
| 246     | 9                | Female | 3849+10kbC>T  | 3849+10kbC>T | No          | No                      | 91.0                       | 9.1  | No                     |                                           | 1            |             |               |              |          |                |             |                |           |              |          |            |            | 1 |

<sup>a</sup> Age in years at start of study. <sup>b</sup> Mean %FEV<sub>1</sub> and standard deviation of the mean (SD) over course of study.

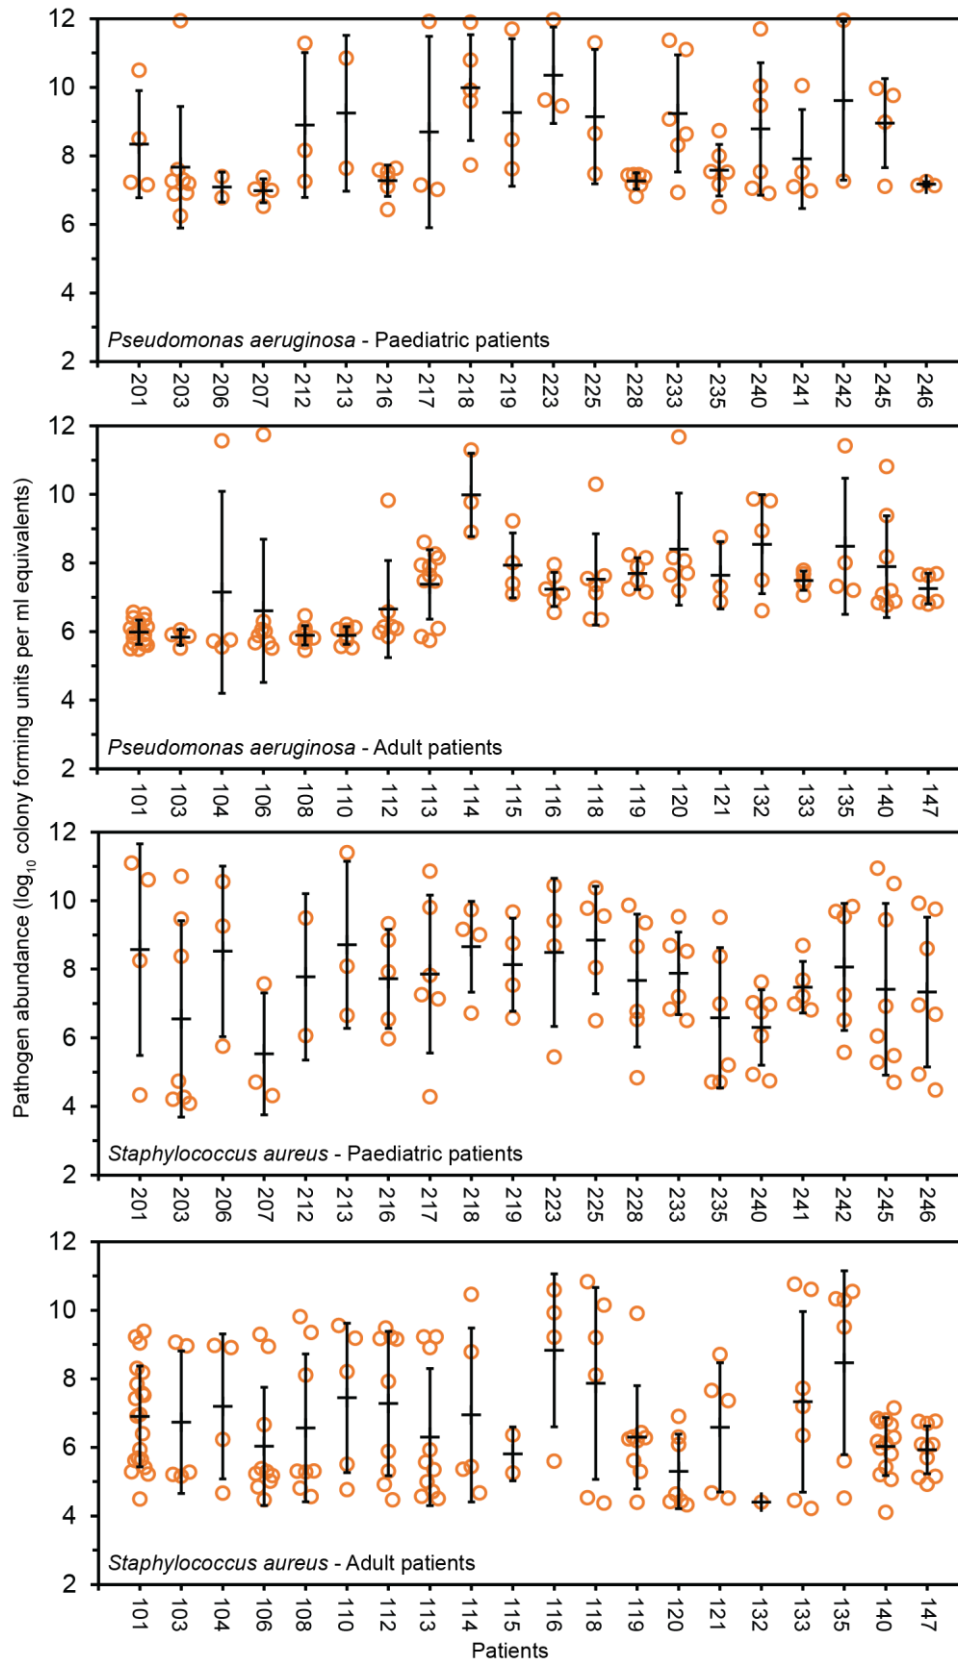

**Figure S1** Pathogen abundance within paediatric and adult patients. Black lines indicate mean and standard deviation (SD) of the mean. Orange circles indicate individual samples for a given patient. For *P. aeruginosa*, the minimum and maximum abundances were  $9.06 \times 10^7$  and  $6.06 \times 10^{10}$  colony forming units (CFU)  $\text{ml}^{-1}$  equivalents, respectively, in paediatric patients (mean  $\pm$  SD,  $1.91 \times 10^9 \pm 1.11 \times 10^1$ ), and ranged from  $2.32 \times 10^7$  to  $4.98 \times 10^{10}$  CFU  $\text{ml}^{-1}$  equivalents in adult patients (mean  $\pm$  SD,  $4.75 \times 10^8 \pm 1.34 \times 10^1$ ). For *S. aureus*, abundance ranged from  $1.29 \times 10^6$  to  $3.70 \times 10^{10}$  CFU  $\text{ml}^{-1}$  equivalents in paediatric patients (mean  $\pm$  SD,  $7.37 \times 10^8 \pm 2.54 \times 10^1$ ), and from  $1.36 \times 10^6$  to  $2.23 \times 10^{10}$  CFU  $\text{ml}^{-1}$  equivalents in adult patients (mean  $\pm$  SD,  $1.85 \times 10^8 \pm 1.14 \times 10^1$ ). Lower detection limits derived from standard curves for *P. aeruginosa* and *S. aureus* were  $2.2 \times 10^2$  and  $5.2 \times 10^3$  CFU  $\text{ml}^{-1}$  equivalents, respectively.

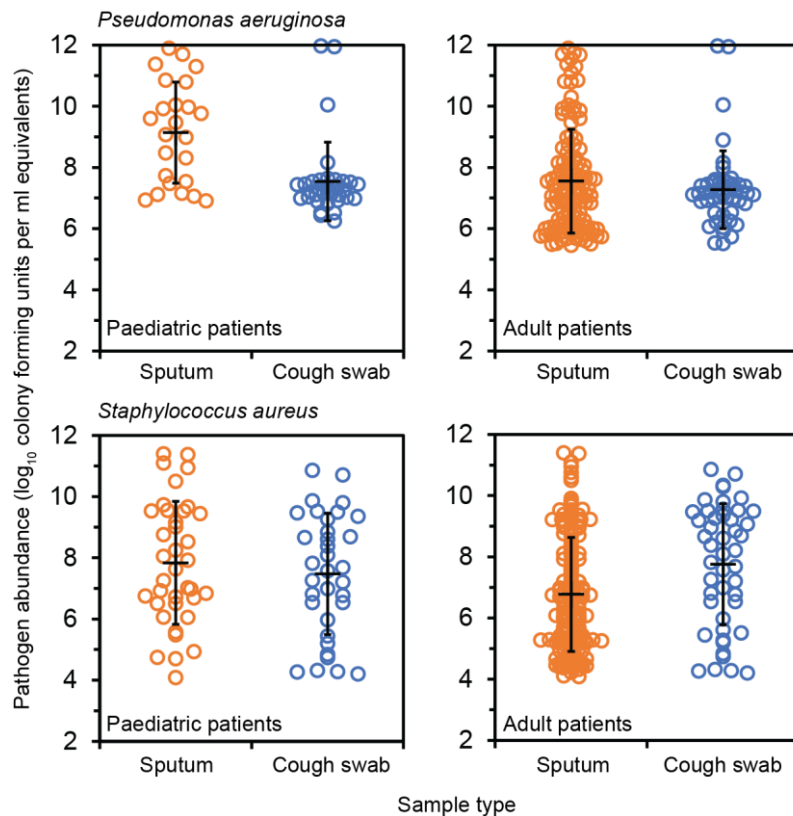

**Figure S2** Comparison of pathogen abundance within paediatric and adult patients by underpinning respiratory sample type. Black lines indicate mean and standard deviation (SD) of the mean. Orange and blue circles indicate individual sputum and cough swab samples from an individual patient, respectively. For *P. aeruginosa* in paediatric patients, mean abundance from sputum and swab, respectively, was  $4.08 \times 10^9 \pm 1.54 \times 10^2$  ( $n = 24$ ) and  $5.97 \times 10^8 \pm 1.21 \times 10^1$  CFU ml<sup>-1</sup> equivalents ( $n = 34$ ); Kruskal-Wallis test,  $H = 12.62$ ,  $P < 0.001$ . In adults, mean *P. aeruginosa* abundance from sputum and cough swabs was  $6.05 \times 10^8 \pm 1.97 \times 10^2$  ( $n = 123$ ) and  $4.13 \times 10^8 \pm 1.10 \times 10^1$  CFU ml<sup>-1</sup> equivalents ( $n = 48$ ), respectively; Kruskal-Wallis test,  $H = 0.27$ ,  $P = 0.601$ . For *S. aureus* in paediatric patients, sputum sample based mean abundance ( $\pm$  SD) was  $8.71 \times 10^8 \pm 1.07 \times 10^3$  CFU ml<sup>-1</sup> equivalents ( $n = 37$ ) and from cough swabs was  $5.42 \times 10^8 \pm 9.35 \times 10^2$  CFU ml<sup>-1</sup> equivalents ( $n = 34$ ); Kruskal-Wallis test,  $H = 0.39$ ,  $P = 0.534$ . In adult patients, mean *S. aureus* abundance from sputum and cough swabs was  $2.03 \times 10^8 \pm 5.06 \times 10^2$  ( $n = 157$ ) and  $7.90 \times 10^8 \pm 9.12 \times 10^2$  CFU ml<sup>-1</sup> equivalents ( $n = 47$ ), respectively; Kruskal-Wallis test,  $H = 1.62$ ,  $P = 0.204$ . Lower detection limits derived from standard curves for *P. aeruginosa* and *S. aureus* were  $2.2 \times 10^2$  and  $5.2 \times 10^3$  CFU ml<sup>-1</sup> equivalents, respectively.



## References

1. Qin X, Emerson J, Stapp J, Stapp L, Abe P, Burns JL. 2003. Use of real-time PCR with multiple targets to identify *Pseudomonas aeruginosa* and other nonfermenting gram-negative bacilli from patients with cystic fibrosis. *J Clin Microbiol* 41:4312-7.
2. Deschaght P, De Baere T, Van Simaey L, Van Daele S, De Baets F, De Vos D, Pirnay JP, Vanechoutte M. 2009. Comparison of the sensitivity of culture, PCR and quantitative real-time PCR for the detection of *Pseudomonas aeruginosa* in sputum of cystic fibrosis patients. *BMC Microbiol* 9:244.
3. Deschaght P, Schelstraete P, Lopes dos Santos Santiago G, Van Simaey L, Haerynck F, Van daele S, De Wachter E, Malfroot A, Lebecque P, Knoop C, Casimir G, Boboli H, Pierart F, Desager K, Vanechoutte M, De Baets F. 2010. Comparison of culture and qPCR for the detection of *Pseudomonas aeruginosa* in not chronically infected cystic fibrosis patients. *BMC Microbiology* 10:245.
4. Billard-Pomares T, Herwegh S, Wizla-Derambure N, Turck D, Courcol R, Husson MO. 2011. Application of quantitative PCR to the diagnosis and monitoring of *Pseudomonas aeruginosa* colonization in 5-18-year-old cystic fibrosis patients. *J Med Microbiol* 60:157-161.
5. Olson AB, Sibley CD, Schmidt L, Wilcox MA, Surette MG, Corbett CR. 2010. Development of real-time PCR assays for detection of the *Streptococcus milleri* group from cystic fibrosis clinical specimens by targeting the cpn60 and 16S rRNA genes. *J Clin Microbiol* 48:1150-60.
6. Zemanick ET, Wagner BD, Sagel SD, Stevens MJ, Accurso FJ, Harris JK. 2010. Reliability of quantitative real-time PCR for bacterial detection in cystic fibrosis airway specimens. *PLoS One* 5:e15101.
7. Logan C, Habington A, Lennon G, Cronin F, O'Sullivan N. 2010. Evaluation of the efficacy of real-time polymerase chain reaction for the routine early detection of *Pseudomonas aeruginosa* in cystic fibrosis sputum and throat swab specimens. *Diagn Microbiol Infect Dis* 68:358-65.
8. McCulloch E, Lucas C, Ramage G, Williams C. 2011. Improved early diagnosis of *Pseudomonas aeruginosa* by real-time PCR to prevent chronic colonisation in a paediatric cystic fibrosis population. *J Cyst Fibros* 10:21-4.
9. Fothergill JL, Ledson MJ, Walshaw MJ, McNamara PS, Southern KW, Winstanley C. 2013. Comparison of real time diagnostic chemistries to detect *Pseudomonas aeruginosa* in respiratory samples from cystic fibrosis patients. *J Cyst Fibros* 12:675-681.
10. Le Gall F, Le Berre R, Rosec S, Hardy J, Gouriou S, Boisramé-Gastrin S, Vallet S, Rault G, Payan C, Héry-Arnaud G. 2013. Proposal of a quantitative PCR-based protocol for an optimal *Pseudomonas aeruginosa* detection in patients with cystic fibrosis. *BMC Microbiol* 13:143.
11. Costaglioli P, Barthe C, Fayon M, Christoflour N, Bui S, Derlich L, Domblides P, Crouzet M, Vilain S, Garbay B. 2014. Selection of *Pseudomonas aeruginosa* reference genes for RT-qPCR analysis from sputum of cystic fibrosis patients. *Mol Cell Probes* 28:10-2.
12. Johnson EJ, Zemanick ET, Accurso FJ, Wagner BD, Robertson CE, Harris JK. 2016. Molecular identification of *Staphylococcus aureus* in airway samples from children with cystic fibrosis. *PLoS One* 11:e0147643.
13. Caverly LJ, Carmody LA, Haig SJ, Kotlarz N, Kalikin LM, Raskin L, LiPuma JJ. 2016. Culture-independent identification of nontuberculous Mycobacteria in cystic fibrosis respiratory samples. *PLoS One* 11:e0153876.
14. Héry-Arnaud G, Nowak E, Caillon J, David V, Dirou A, Revert K, Munck MR, Frachon I, Haloun A, Horeau-Langlard D, Le Bihan J, Danner-Boucher I, Ramel S, Pelletier MP, Rosec S, Gouriou S, Poulhazan E, Payan C, Férec C, Rault G, Le Gal G, Le Berre R. 2017. Evaluation of quantitative PCR for early diagnosis of *Pseudomonas aeruginosa* infection in cystic fibrosis: a prospective cohort study. *Clin Microbiol Infect* 23:203-207.
15. Hisert KB, Heltshe SL, Pope C, Jorth P, Wu X, Edwards RM, Radey M, Accurso FJ, Wolter DJ, Cooke G, Adam RJ, Carter S, Grogan B, Launspach JL, Donnelly SC, Gallagher CG, Bruce JE, Stoltz DA, Welsh MJ, Hoffman LR, McKone EF, Singh PK. 2017. Restoring cystic fibrosis transmembrane conductance regulator function reduces airway bacteria and

- inflammation in people with cystic fibrosis and chronic lung infections. *Am J Respir Crit Care Med* 195:1617-1628.
16. Boutin S, Weitnauer M, Hassel S, Graeber SY, Stahl M, Dittrich AS, Mall MA, Dalpke AH. 2018. One time quantitative PCR detection of *Pseudomonas aeruginosa* to discriminate intermittent from chronic infection in cystic fibrosis. *J Cyst Fibros* 17:348-355.
  17. Blanchard AC, Rooney AM, Yau Y, Zhang Y, Stapleton PJ, Horton E, Klingel M, Stanojevic S, Ratjen F, Coburn B, Waters V. 2018. Early detection using qPCR of *Pseudomonas aeruginosa* infection in children with cystic fibrosis undergoing eradication treatment. *J Cyst Fibros* 17:723-728.
  18. Mangiaterra G, Amiri M, Di Cesare A, Pasquaroli S, Manso E, Cirilli N, Citterio B, Vignaroli C, Biavasco F. 2018. Detection of viable but non-culturable *Pseudomonas aeruginosa* in cystic fibrosis by qPCR: a validation study. *BMC Infect Dis* 18:701.
  19. Fraser TA, Bell MG, Harris PNA, Bell SC, Bergh H, Nguyen TK, Kidd TJ, Nimmo GR, Sarovich DS, Price EP. 2019. Quantitative real-time PCR assay for the rapid identification of the intrinsically multidrug-resistant bacterial pathogen *Stenotrophomonas maltophilia*. *Microb Genom* 5.
  20. Taylor SL, Leong LEX, Ivey KL, Wesselingh S, Grimwood K, Wainwright CE, Rogers GB. 2020. Total bacterial load, inflammation, and structural lung disease in paediatric cystic fibrosis. *J Cyst Fibros* 19:923-930.
  21. Einarsson GG, Ronan NJ, Mooney D, McGettigan C, Mullane D, NiChroinin M, Shanahan F, Murphy DM, McCarthy M, McCarthy Y, Eustace JA, Gilpin DF, Elborn JS, Plant BJ, Tunney MM. 2021. Extended-culture and culture-independent molecular analysis of the airway microbiota in cystic fibrosis following CFTR modulation with ivacaftor. *J Cyst Fibros* 20:747-753.
